# TAKING ISSUE

## How I Stopped Fearing Technology-Based Interventions

As a researcher who develops technology-based tools for the assessment and treatment of mental illness, I am used to encountering skepticism from practitioners, administrators, and services researchers. Some clinicians are apprehensive about losing the “human touch” and weakening the therapeutic alliance, and others worry about being replaced by a machine. Administrators struggle to envision technology-assisted programs, the necessary infrastructure, or billing models that reimburse novel services. Even progressive services researchers often doubt that “cold” technologies can be potent. I understand their apprehension because as a clinical psychologist with an inclination toward technophobia, I had similar concerns.

I came to the field of clinical psychology exactly because I believed in the healing power of human connection. Initially, I conducted research using mobile technology and experience-sampling measures to understand psychopathology. I used these approaches not because I was enamored with the gadgetry, but because I believed that they would provide insights into the lives of people coping with debilitating conditions. They did, and I also witnessed something completely unexpected: instead of being burdened by the research, participants reported feeling better after a period of using the technologies. This was particularly startling, given that we were not intending to help in any way—void of intervention content, the technology was meant to facilitate data collection, without influencing behavior. But participants reported that this process made them introspect about their condition, relationships, and goals. Using a handheld device, they were willing to report problems that they had never endorsed in clinical interviews. As these accidental therapeutic outcomes accumulated, I began to wonder how technology could be used for intentional treatments. I have since conducted multiple projects using increasingly sophisticated technology in a host of settings and with a range of clinical populations. I typically find that with appropriate training and support, even people with severe conditions can use technological tools successfully.

As a community of clinicians, stakeholders, and researchers, we need to understand that those in need of care are more technologically savvy than ever before. Many already seek information about their conditions and treatments online or in an app store. It is essential that we adapt our treatment models so that these individuals can benefit from opportunities afforded by emerging technology. Not doing so because of our own preferences and predilections would be a great disservice.

Enthusiasm for technology-based interventions continues to grow among policy makers and funders. Legislative action has created incentives for organizations that are nimble enough to modernize their models of care. Close collaboration and cross-fertilization between technologists, “traditionalists,” and those of us who are in between will ensure that individuals with psychiatric disabilities benefit from the best technology and human-delivered care in the years ahead.—DROR BEN-ZEEV, PH.D., *Psychiatric Research Center, Geisel School of Medicine at Dartmouth, Lebanon, New Hampshire*

*Psychiatric Services*, established in 1950, is published monthly by the American Psychiatric Association for mental health professionals and others concerned with treatment and services for persons with mental illnesses and mental disabilities, in keeping with APA's objectives to improve care and treatment, to promote research and professional education in psychiatric and related fields, and to advance the standards of all psychiatric services and facilities.

### Editor

Howard H. Goldman, M.D., Ph.D.

### Editorial Board

David A. Adler, M.D.  
Regina Bussing, M.D., M.S.H.S.  
Javier I. Escobar, M.D.  
Stephen M. Goldfinger, M.D.  
Richard K. Harding, M.D.  
Marcela Horvitz-Lennon, M.D., M.P.H.  
Roberto Lewis-Fernández, M.D.  
Ramin Mojtabai, M.D., Ph.D.  
Mark R. Munetz, M.D.  
Martha Sajatovic, M.D.  
Gregory E. Simon, M.D., M.P.H.  
T. Scott Stroup, M.D., M.P.H.

### Editor Emeritus

John A. Talbott, M.D.

### Book Review Editor

Jeffrey L. Geller, M.D., M.P.H.

### Contributing Editors

Paul S. Appelbaum, M.D., *Law & Psychiatry*  
José Miguel Caldas de Almeida, M.D., and Matt Muijen, M.D., Ph.D., *Global Mental Health Reforms*  
Francine Cournos, M.D., and Stephen M. Goldfinger, M.D., *Frontline Reports*  
Lisa B. Dixon, M.D., M.P.H., and Brian Hepburn, M.D., *Research and Services Partnerships*  
Benjamin G. Druss, M.D., M.P.H., *Integrated Care*  
Jeffrey L. Geller, M.D., M.P.H., *Personal Accounts*  
Marcela Horvitz-Lennon, M.D., M.P.H., *Best Practices*  
Amy M. Kilbourne, Ph.D., M.P.H., and Tami L. Mark, Ph.D., *Datapoints*  
Fred C. Osher, M.D., and Marvin S. Swartz, M.D., *State Mental Health Policy*  
Jules M. Ranz, M.D., Susan M. Deakins, M.D., and Stephanie Le Melle, M.D., *Case Studies in Public-Sector Leadership*  
Steven S. Sharfstein, M.D., Haiden A. Huskamp, Ph.D., and Alison Evans Cuellar, Ph.D., *Economic Grand Rounds*

### Statistical Consultant

Deborah R. Medoff, Ph.D.

### Editorial Consultants

Joseph M. Cerimele, M.D.  
Julie M. Donohue, Ph.D.  
Robert E. Drake, M.D., Ph.D.  
M. Susan Ridgely, J.D.  
Laura Van Tosh

### Editorial Staff

Constance Grant Gartner, *Managing Editor*  
Demarie S. Jackson, *Associate Editor*  
Kathleen Stearman, *Associate Editor*  
Wendy Lieberman Taylor, *Production Manager*  
Y. Nicole Gray, *Editorial Support Services Manager*

### Publisher

Rebecca D. Rinehart

### American Psychiatric Association

Paul Summergrad, M.D., *President*  
Renée L. Binder, M.D., *President-Elect*  
Maria A. Oquendo, M.D., *Secretary*  
Frank Brown, M.D., *Treasurer*  
Jenny L. Boyer, M.D., Ph.D., J.D., *Speaker, APA Assembly*  
Saul Levin, M.D., M.P.A., *Chief Executive Officer and Medical Director*
