October 2014

# PSYCHIATRIC SERVICES

A Journal of the  
American Psychiatric  
Association

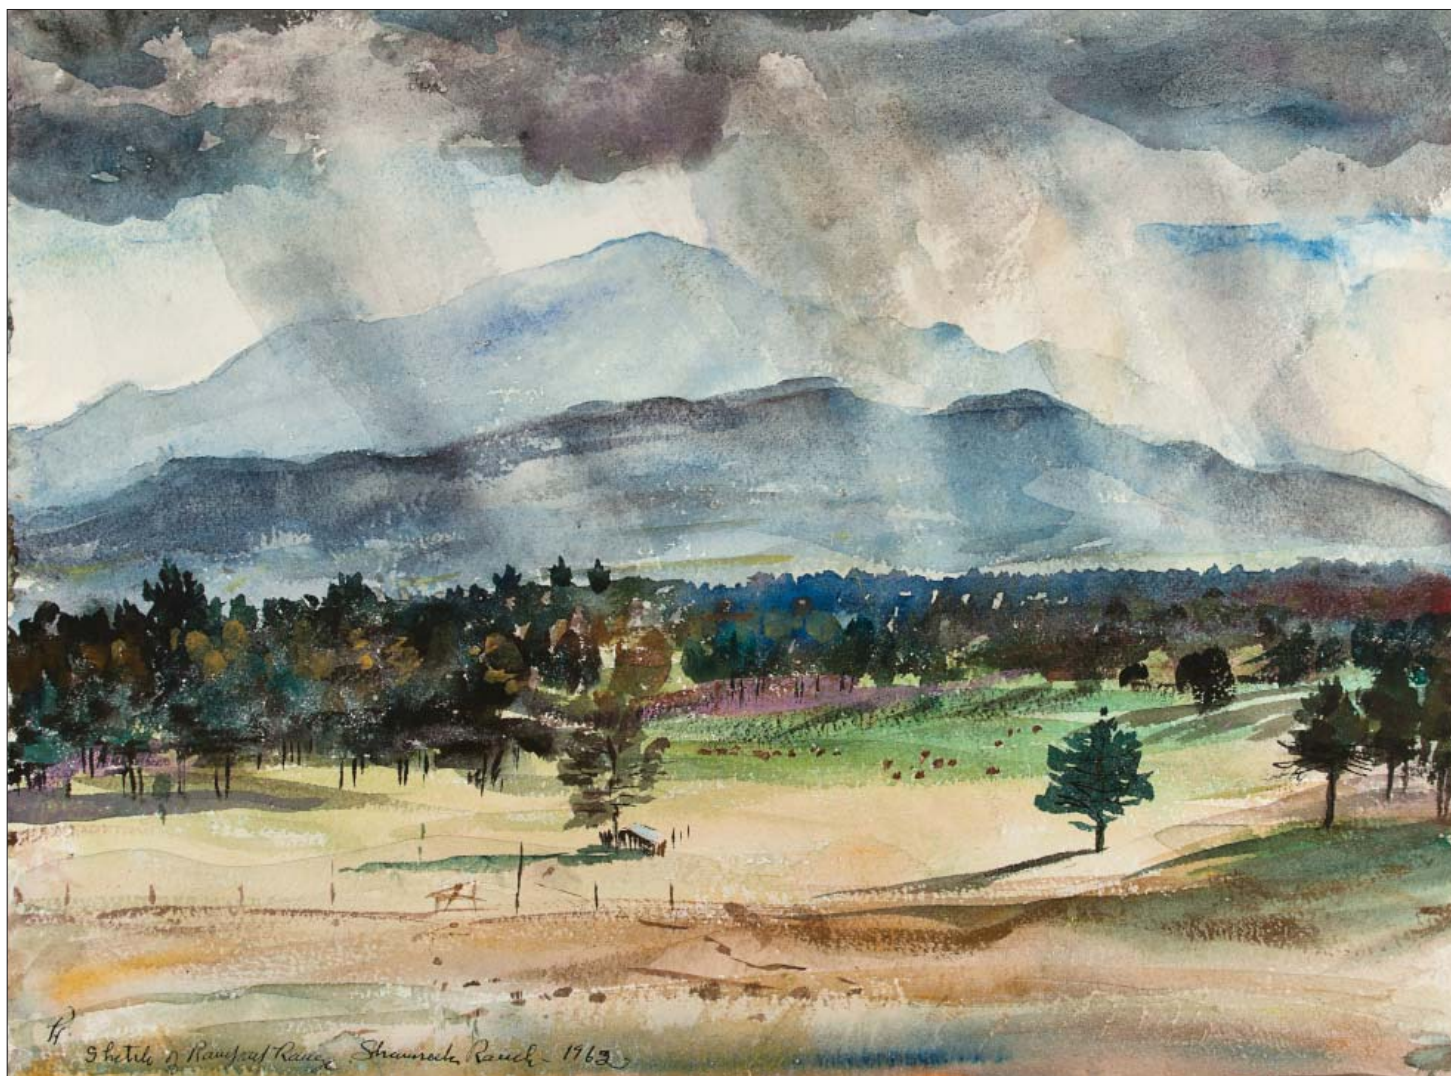

◆ Three Studies Examine  
VA's Efforts to Improve  
Engagement in Treatment

◆ Employment Status of  
People With Mental Illness:  
National Data, 2009–2010

◆ Maine's PIER Program:  
A Community Effort to  
Prevent Psychosis Onset
